# Supplementary material for: Aronia melanocarpa Fruits as a Rich Dietary Source of Chlorogenic Acids and Anthocyanins: 1H-NMR, HPLC-DAD, and Chemometric Studies
Source: PubMed Central journal article supplement (PMC7397235; doi:10.3390/molecules25143234), 2020-07-15
Supplement: molecules-25-03234-s001.pdf [file molecules-25-03234-s001.pdf]

**Supplementary Materials:**

**Table 1. S.** Contents of chlorogenic acids and anthocyanins in extracts [mg compound/100 mg of extract]; different letters mean statistical difference by Tukey's test ( $p < 0.05$ ).

|       |        | <b>nCGA</b>                | <b>CGA</b>                 | <b>Sum of CGAs</b> | <b>CyaGal</b>                | <b>CyaGlu</b>                | <b>CyaAra</b>              | <b>CyaXy</b>                 | <b>Sum Anthoc</b> |
|-------|--------|----------------------------|----------------------------|--------------------|------------------------------|------------------------------|----------------------------|------------------------------|-------------------|
| LS 1  | 26-May | 3.43 ± 0.19                | 3.42 ± 0.19                | 6.850              | ND                           | ND                           | ND                         | ND                           | ND                |
| LS 2  | 12-Jun | 3.14 ± 0.18                | 2.35 ± 0.16                | 5.491              | ND                           | ND                           | ND                         | ND                           | ND                |
| LS 3  | 26-Jun | 2.24 ± 0.07                | 1.94 ± 0.05                | 4.175              | ND                           | ND                           | ND                         | ND                           | ND                |
| LS 4  | 10-Jul | 1.51 ± 0.13                | 1.45 ± 0.08                | 2.963              | 0.044 <sup>a</sup> ± 0.004   | 0.004 ± 0.000                | 0.016 ± 0.002              | ND                           | 0.063             |
| LS 5  | 24-Jul | 0.47 <sup>a,b</sup> ± 0.02 | 0.54 <sup>a</sup> ± 0.03   | 1.014              | 1.081 <sup>b</sup> ± 0.048   | 0.049 <sup>a</sup> ± 0.003   | 0.755 ± 0.029              | 0.078 ± 0.003                | 1.963             |
| LS 6  | 7-Aug  | 0.37 <sup>a,b</sup> ± 0.02 | 0.48 <sup>a,b</sup> ± 0.02 | 0.848              | 2.323 <sup>c</sup> ± 0.112   | 0.107 ± 0.004                | 1.39 <sup>a</sup> ± 0.066  | 0.223 <sup>a</sup> ± 0.009   | 4.043             |
| LS 7  | 21-Aug | 0.27 <sup>b</sup> ± 0.01   | 0.40 <sup>a,b</sup> ± 0.01 | 0.671              | 2.320 <sup>c</sup> ± 0.027   | 0.088 ± 0.001                | 1.378 <sup>a</sup> ± 0.013 | 0.213 <sup>a</sup> ± 0.013   | 3.999             |
| LS 8  | 4-Sep  | 0.28 <sup>b</sup> ± 0.04   | 0.42 <sup>a,b</sup> ± 0.05 | 0.704              | 0.978 <sup>b</sup> ± 0.063   | 0.052 <sup>a</sup> ± 0.004   | 0.675 ± 0.042              | 0.115 ± 0.006                | 1.819             |
| LS 9  | 18-Sep | 0.24 <sup>b</sup> ± 0.01   | 0.38 <sup>b</sup> ± 0.02   | 0.621              | 0.220 <sup>d,e</sup> ± 0.023 | 0.015 <sup>b,c</sup> ± 0.002 | 0.155 <sup>b</sup> ± 0.018 | 0.027 <sup>b,c</sup> ± 0.003 | 0.417             |
| LS 10 | 16-Oct | 0.22 <sup>b</sup> ± 0.01   | 0.35 <sup>b</sup> ± 0.02   | 0.573              | 0.288 <sup>d</sup> ± 0.015   | 0.018 <sup>b</sup> ± 0.001   | 0.215 ± 0.014              | 0.035 <sup>b</sup> ± 0.002   | 0.557             |
| LS 11 | 30-Oct | 0.21 <sup>b</sup> ± 0.01   | 0.32 <sup>b</sup> ± 0.01   | 0.528              | 0.124 <sup>a,e</sup> ± 0.008 | 0.012 <sup>c</sup> ± 0.001   | 0.108 <sup>b</sup> ± 0.007 | 0.021 <sup>c</sup> ± 0.002   | 0.265             |
| LE 1  | 26-May | 1.51 <sup>a</sup> ± 0.09   | 1.53 <sup>a</sup> ± 0.09   | 0.067              | ND                           | ND                           | ND                         | ND                           | ND                |
| LE 2  | 12-Jun | 1.54 <sup>a</sup> ± 0.10   | 1.55 <sup>a</sup> ± 0.16   | 0.079              | ND                           | ND                           | ND                         | ND                           | ND                |
| LE 3  | 26-Jun | 1.88 <sup>a</sup> ± 0.10   | 1.65 <sup>a</sup> ± 0.22   | 0.003              | ND                           | ND                           | ND                         | ND                           | ND                |
| LE 4  | 10-Jul | 1.92 <sup>a</sup> ± 0.20   | 1.75 <sup>a</sup> ± 0.19   | 0.014              | ND                           | ND                           | ND                         | ND                           | ND                |
| LE 5  | 24-Jul | 0.45 <sup>b</sup> ± 0.06   | 0.40 <sup>b</sup> ± 0.05   | 0.026              | 0.1 ± 0                      | 0 ± 0                        | 0.03 ± 0                   | 0 ± 0                        | 0.13              |
| LE 6  | 7-Aug  | 0.44 <sup>b</sup> ± 0.06   | 0.51 <sup>b</sup> ± 0.07   | 0.011              | 1.35 <sup>a</sup> ± 0.14     | 0.05 <sup>a,b</sup> ± 0.02   | 0.83 <sup>a</sup> ± 0.08   | 0.10 <sup>a,c</sup> ± 0.04   | 2.33              |
| LE 7  | 21-Aug | 0.28 <sup>b</sup> ± 0.07   | 0.31 <sup>b</sup> ± 0.08   | 0.000              | 1.46 <sup>a</sup> ± 0.30     | 0.06 <sup>a</sup> ± 0.01     | 0.85 <sup>a</sup> ± 0.12   | 0.11 <sup>a</sup> ± 0.03     | 2.48              |
| LE 8  | 4-Sep  | 0.30 <sup>b</sup> ± 0.01   | 0.37 <sup>b</sup> ± 0.02   | 0.000              | 1.47 <sup>a</sup> ± 0.01     | 0.07 <sup>a</sup> ± 0.01     | 0.97 <sup>a</sup> ± 0.01   | 0.13 <sup>b</sup> ± 0.01     | 2.63              |
| LE 9  | 18-Sep | 0.27 <sup>b</sup> ± 0.01   | 0.37 <sup>b</sup> ± 0.01   | 0.000              | 1.27 <sup>a</sup> ± 0.05     | 0.05 <sup>a,b</sup> ± 0.00   | 0.90 <sup>a</sup> ± 0.05   | 0.13 <sup>b</sup> ± 0.01     | 2.36              |
| LE 10 | 16-Oct | 0.29 <sup>b</sup> ± 0.02   | 0.38 <sup>b</sup> ± 0.03   | 0.000              | 0.92 <sup>b</sup> ± 0.13     | 0.04 <sup>b</sup> ± 0.01     | 0.69 <sup>b</sup> ± 0.11   | 0.08 <sup>c</sup> ± 0.01     | 1.73              |
| LE 11 | 30-Oct | 0.27 <sup>b</sup> ± 0.01   | 0.36 <sup>b</sup> ± 0.01   | 0.000              | 0.99 <sup>b</sup> ± 0.08     | 0.04 <sup>b</sup> ± 0.00     | 0.67 <sup>b</sup> ± 0.07   | 0.08 <sup>c</sup> ± 0.01     | 1.78              |

**Table S2.** The precision and intra-/interday repeatability of the HPLC method for determination of chlorogenic acids and anthocyanins in extracts.

| Analyte | Conc. (mg/mL) | Measured Conc. (mg/mL) <sup>a</sup> | RSD (%) <sup>a</sup> | Intraday RSD (%) <sup>b</sup> | Interday RSD (%) <sup>c</sup> |
|---------|---------------|-------------------------------------|----------------------|-------------------------------|-------------------------------|
| CGA     | 0.050         | 0.049                               | 1.76                 | 1.81                          | 1.89                          |
|         | 0.100         | 0.098                               | 1.11                 | 1.24                          | 1.34                          |
|         | 0.200         | 0.192                               | 1.18                 | 1.09                          | 1.22                          |
| CyaGal  | 0.010         | 0.010                               | 1.33                 | 1.36                          | 1.55                          |
|         | 0.100         | 0.098                               | 1.11                 | 1.32                          | 1.61                          |
|         | 0.200         | 0.201                               | 0.97                 | 1.10                          | 1.31                          |

<sup>a</sup>Precision analysis (n=5), <sup>b</sup>the analyses were carried out at 0, 3, and 8 hrs on the same day, <sup>c</sup>the analyses were carried out next day.

**Table S3.** The trueness and stability assessment (each concentration was analyzed in triplicate (n=3))

| Analyte          | Original Conc.* (mg/mL) | Spiked Conc. (mg/mL) | Found Conc.* (mg/mL) | Recovery (%) | Found Conc. after 24h* (mg/mL) | Recovery after 24h (%) |
|------------------|-------------------------|----------------------|----------------------|--------------|--------------------------------|------------------------|
| Green fruits LS2 |                         |                      |                      |              |                                |                        |
| nCGA             | 0.031                   | 0.020                | 0.0515               | 102.5± 0.2   | 0.051                          | 99.0± 0.1              |
| CGA              | 0.023                   | 0.020                | 0.0425               | 97.5± 0.2    | 0.042                          | 97.0± 0.1              |
| CyaGal           | 0.000                   | 0.020                | 0.0195               | 97.5± 0.2    | 0.019                          | 95.0± 0.1              |
| CyaAra           | 0.000                   | 0.020                | 0.0205               | 102.5± 0.2   | 0.020                          | 97.5± 0.1              |
| CyaGlu           | 0.000                   | 0.020                | 0.0195               | 97.5± 0.1    | 0.019                          | 95.0± 0.1              |
| Red fruits LS7   |                         |                      |                      |              |                                |                        |
| nCGA             | 0.027                   | 0.020                | 0.0698               | 99.0± 0.1    | 0.070                          | 97.5± 0.2              |
| CGA              | 0.040                   | 0.020                | 0.1205               | 102.5± 0.2   | 0.120                          | 100.5± 0.1             |
| CyaGal           | 0.067                   | 0.020                | 0.2197               | 98.5± 0.1    | 0.219                          | 95.0± 0.2              |
| CyaAra           | 0.0138                  | 0.020                | 0.0297               | 98.5± 0.2    | 0.029                          | 95.5± 0.1              |
| CyaGlu           | 0.0088                  | 0.020                | 0.1198               | 99.0± 0.1    | 0.119                          | 95.0± 0.1              |

<sup>a</sup>Average values
